# Supplementary figures and images for: Efficient extraction method to collect sugar from sweet sorghum
Source: Springer Nature journal article supplement (doi:10.1186/1754-1611-7-1), 2013-01-10

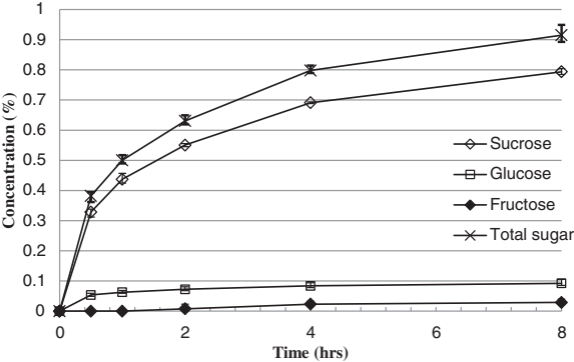

Supplement: 13036_2012_106_MOESM4_ESM.pdf [file 13036_2012_106_MOESM4_ESM.pdf]
